# Supplementary material
Source: PubMed Central journal article supplement (PMC3631582)
Supplement: NIHMS390799-supplement-01.pdf [file NIHMS390799-supplement-01.pdf]

**Table 1:**

| <b>Reading Center Team grading agreement for qualitative OCT evaluation</b> |              |                          |                        |                                     |                                     |
|-----------------------------------------------------------------------------|--------------|--------------------------|------------------------|-------------------------------------|-------------------------------------|
| <b>Variable</b>                                                             | <b>Total</b> | <b>Percent Agreement</b> | <b>Kappa Statistic</b> | <b>Kappa Statistic Lower 95% CL</b> | <b>Kappa Statistic Upper 95% CL</b> |
| Vitreomacular attachment                                                    | 269*         | 94                       | 0.74                   | 0.63                                | 0.86                                |
| Vitreomacular attachment with foveal deformation                            | 269          | 96                       | 0.53                   | 0.28                                | 0.78                                |
| Epiretinal Membrane                                                         | 269          | 82                       | 0.49                   | 0.37                                | 0.61                                |
| Epiretinal Membrane with foveal deformation                                 | 269          | 90                       | 0.46                   | 0.31                                | 0.61                                |
| <b>Intraretinal Fluid (Cysts)</b>                                           | <b>269</b>   | <b>73</b>                | <b>0.48</b>            | <b>0.38</b>                         | <b>0.58</b>                         |
| Intraretinal Fluid within fovea                                             | 269          | 73                       | 0.48                   | 0.38                                | 0.58                                |
| Intraretinal Fluid at foveal center                                         | 269          | 85                       | 0.63                   | 0.53                                | 0.73                                |
| Retinal Pigment Epithelial (RPE) Elevation                                  | 270          | 90                       | **                     | **                                  | **                                  |
| <b>Sub-RPE Fluid</b>                                                        | <b>269</b>   | <b>88</b>                | <b>0.75</b>            | <b>0.67</b>                         | <b>0.83</b>                         |
| Sub-RPE Fluid within fovea                                                  | 269          | 93                       | 0.79                   | 0.70                                | 0.88                                |
| Sub-RPE Fluid at foveal center                                              | 269          | 90                       | 0.77                   | 0.68                                | 0.85                                |
| Subretinal Hyper Reflective Material                                        | 269          | 87                       | 0.75                   | 0.67                                | 0.83                                |
| Subretinal Hyper Reflective Material within fovea                           | 269          | 88                       | 0.78                   | 0.71                                | 0.85                                |
| <b>Subretinal Fluid</b>                                                     | <b>270</b>   | <b>90</b>                | <b>0.80</b>            | <b>0.73</b>                         | <b>0.87</b>                         |
| Subretinal Fluid within fovea                                               | 270          | 89                       | 0.75                   | 0.67                                | 0.83                                |
| Subretinal Fluid at foveal center                                           | 270          | 93                       | 0.81                   | 0.72                                | 0.89                                |
| <b>Macular Fluid</b>                                                        | <b>270</b>   | <b>84</b>                | <b>0.55</b>            | <b>0.43</b>                         | <b>0.67</b>                         |

OCT = optical coherence tomography. CL = confidence limit. Fovea = 1 mm diameter horizontal region centered at the middle of the fovea. VMA = any vitreous attachment and separation from the retina within a 3 mm diameter horizontal region centered at the middle of the fovea, foveal deformation = any retinal distortion within the fovea. RPE = retinal pigment epithelium. Macular fluid = presence of any one or more of the following: intraretinal fluid, subretinal fluid, or sub-RPE fluid.\*= A single scan had missing data during repeat grading of categorical measures.\*\* = kappa could not be computed for

tables that were asymmetric or that were symmetric without matching rows and columns. The second grading team re-graded images at least 5 weeks after the images were initially graded by the first grading team. A morphological feature was not interpretable for grading if any one of the following conditions existed: inadequate positioning, poor saturation, absent scan, or portion of feature extends off radial line scan.
