# Supplementary material
Source: PubMed Central journal article supplement (PMC3631582)
Supplement: NIHMS390799-supplement-02.pdf [file NIHMS390799-supplement-02.pdf]

**Table 2:**

| <b>Reading Center Team grading agreement for quantitative OCT evaluation</b> |                  |                              |                              |                          |                 |
|------------------------------------------------------------------------------|------------------|------------------------------|------------------------------|--------------------------|-----------------|
| <b>Variable</b>                                                              | <b>Statistic</b> | <b>Reading Center Team A</b> | <b>Reading Center Team B</b> | <b>Paired Difference</b> | <b>P-Value*</b> |
| RPE Elevation Height - maximum vertical dimension on any scan (micrometers)  | N                |                              |                              | 226*                     |                 |
|                                                                              | Mean (SD)        | 165 (159)                    | 177 (175)                    | -8 (42)                  |                 |
|                                                                              | Min,Median,Max   | 22,121,1210                  | 22,116,1210                  | -220,0,110               | 0.02            |
|                                                                              | ICC (95% CI)     |                              |                              | 0.97 (0.96 to 0.97)      |                 |
| RPE Elevation Width - maximum horizontal dimension on any scan (micrometers) | N                |                              |                              | 210**                    |                 |
|                                                                              | Mean (SD)        | 771 (525)                    | 808 (535)                    | -62 (313)                |                 |
|                                                                              | Min,Median,Max   | 110,616,2530                 | 88,665.5,2607                | -1320,-11,1760           | 0.001           |
|                                                                              | ICC (95% CI)     |                              |                              | 0.81 (0.76 to 0.85)      |                 |
| Mean Retinal Thickness at Foveal Center Point (micrometers)                  | N                |                              |                              | 270                      |                 |
|                                                                              | Mean (SD)        | 174 (82)                     | 177 (82)                     | -3 (30)                  |                 |
|                                                                              | Min,Median,Max   | 18,161,557                   | 11,161,559                   | -223,0,172               | 0.43            |
|                                                                              | ICC (95% CI)     |                              |                              | 0.93 (0.92 to 0.95)      |                 |
| Mean Subretinal Fluid Thickness at Foveal Center Point (micrometers)         | N                |                              |                              | 270                      |                 |
|                                                                              | Mean (SD)        | 10 (33)                      | 9 (30)                       | 0.6 (14)                 |                 |
|                                                                              | Min,Median,Max   | 0,0,229                      | 0,0,255                      | -37,0,167                | 0.33            |
|                                                                              | ICC (95% CI)     |                              |                              | 0.90 (0.88 to 0.92)      |                 |
| CNV-PED Complex Thickness at Foveal Center Point (micrometers)               | N                |                              |                              | 270                      |                 |
|                                                                              | Mean (SD)        | 144 (160)                    | 145 (159)                    | -2 (30)                  |                 |
|                                                                              | Min,Median,Max   | 22,68,1045                   | 22,78,1027                   | -231,0,145               | 0.058           |
|                                                                              | ICC (95% CI)     |                              |                              | 0.98 (0.98 to 0.99)      |                 |
| <b>Mean Total Thickness at Foveal Center Point (micrometers)</b>             | N                |                              |                              | 270                      |                 |
|                                                                              | Mean (SD)        | 327 (181)                    | 331 (182)                    | -4 (26)                  |                 |
|                                                                              | Min,Median,Max   | 114,260,1136                 | 112, 264,1205                | -84,0,99                 | 0.026           |
|                                                                              | ICC (95% CI)     |                              |                              | 0.99 (0.99 to 0.99)      |                 |

OCT = optical coherence tomography. RPE = retinal pigment epithelium. CNV-PED complex = Mean RPE + RPE Elevation + Subretinal Hyper Reflective Material thickness. ICC = intraclass correlation. SD = standard deviation. CI = confidence interval. Thickness refers to measurement of vertical dimension at the foveal center point unless otherwise specified. The second grading teams performed repeat evaluation of images at least 5 weeks after the images were initially graded by the first grading team. A morphological feature was not interpretable for grading if any one of the following conditions existed: inadequate positioning, poor saturation, absent scan, or portion of feature extends off radial line scan. \*RPE Elevation not present on every scan for measurement. \*\* RPE Elevation width extended off screen preventing measurement in 16 scans.
