# Supplementary material
Source: PubMed Central journal article supplement (PMC3631582)
Supplement: NIHMS390799-supplement-03.pdf [file NIHMS390799-supplement-03.pdf]

**Table 3:**

**Reading Center Team qualitative agreement during four serial OCT evaluations.**

| Variable                                         | Comparison between Grading Time | Total | Percent Agreement | Kappa Statistic | Kappa Statistic Lower 95% CL | Kappa Statistic Upper 95% CL |
|--------------------------------------------------|---------------------------------|-------|-------------------|-----------------|------------------------------|------------------------------|
| Vitreomacular attachment                         | 1-2                             | 23    | 100               | 1.00            | 1.00                         | 1.00                         |
|                                                  | 1-3                             | 23    | 96                | 0.78            | 0.37                         | 1.00                         |
|                                                  | 1-4                             | 23    | 100               | 1.00            | 1.00                         | 1.00                         |
| Vitreomacular attachment with foveal deformation | 1-2                             | 23    | 100               | 1.00            | 1.00                         | 1.00                         |
|                                                  | 1-3                             | 23    | 100               | 1.00            | 1.00                         | 1.00                         |
|                                                  | 1-4                             | 23    | 100               | 1.00            | 1.00                         | 1.00                         |
| Epiretinal Membrane                              | 1-2                             | 23    | 87                | 0.69            | 0.37                         | 1.00                         |
|                                                  | 1-3                             | 23    | 74                | *               | *                            | *                            |
|                                                  | 1-4                             | 23    | 74                | 0.42            | 0.01                         | 0.82                         |
| Epiretinal Membrane with foveal deformation      | 1-2                             | 23    | 96                | 0.78            | 0.37                         | 1.00                         |
|                                                  | 1-3                             | 23    | 83                | *               | *                            | *                            |
|                                                  | 1-4                             | 23    | 96                | 0.78            | 0.37                         | 1.00                         |
| <b>Intraretinal Fluid (Cysts)</b>                | 1-2                             | 23    | 65                | 0.35            | -0.03                        | 0.74                         |
|                                                  | 1-3                             | 23    | 57                | *               | *                            | *                            |
|                                                  | 1-4                             | 23    | 70                | *               | *                            | *                            |
| Intraretinal Fluid within fovea                  | 1-2                             | 23    | 65                | 0.38            | 0.04                         | 0.73                         |
|                                                  | 1-3                             | 23    | 57                | *               | *                            | *                            |
|                                                  | 1-4                             | 23    | 65                | *               | *                            | *                            |
| Intraretinal Fluid at foveal center              | 1-2                             | 23    | 91                | 0.79            | 0.51                         | 1.00                         |
|                                                  | 1-3                             | 23    | 91                | *               | *                            | *                            |
|                                                  | 1-4                             | 23    | 83                | 0.57            | 0.19                         | 0.95                         |
| Retinal Pigment Epithelial (RPE) Elevation       | 1-2                             | 23    | 96                | 0.65            | 0.01                         | 1.00                         |
|                                                  | 1-3                             | 23    | 100               | 1.00            | 1.00                         | 1.00                         |
|                                                  | 1-4                             | 23    | 96                | *               | *                            | *                            |
| <b>Sub-RPE Fluid</b>                             | 1-2                             | 23    | 78                | *               | *                            | *                            |
|                                                  | 1-3                             | 23    | 91                | *               | *                            | *                            |
|                                                  | 1-4                             | 23    | 91                | 0.83            | 0.60                         | 1.00                         |
| Sub-RPE Fluid at foveal center                   | 1-2                             | 23    | 87                | 0.73            | 0.44                         | 1.00                         |
|                                                  | 1-3                             | 23    | 87                | 0.73            | 0.47                         | 0.98                         |
|                                                  | 1-4                             | 23    | 96                | 0.90            | 0.71                         | 1.00                         |

**Reading Center Team qualitative agreement during four serial OCT evaluations.**

| Variable                                          | Comparison between Grading Time | Total | Percent Agreement | Kappa Statistic | Kappa Statistic Lower 95% CL | Kappa Statistic Upper 95% CL |
|---------------------------------------------------|---------------------------------|-------|-------------------|-----------------|------------------------------|------------------------------|
| Sub-RPE Fluid within fovea                        | 1-2                             | 23    | 91                | 0.76            | 0.45                         | 1.00                         |
|                                                   | 1-3                             | 23    | 87                | 0.64            | 0.32                         | 0.97                         |
|                                                   | 1-4                             | 23    | 100               | 1.00            | 1.00                         | 1.00                         |
| Subretinal Hyper Reflective Material              | 1-2                             | 23    | 83                | 0.66            | 0.34                         | 0.97                         |
|                                                   | 1-3                             | 22    | 82                | 0.65            | 0.33                         | 0.97                         |
|                                                   | 1-4                             | 23    | 74                | 0.51            | 0.16                         | 0.85                         |
| Subretinal Hyper Reflective Material within fovea | 1-2                             | 23    | 91                | 0.82            | 0.58                         | 1.00                         |
|                                                   | 1-3                             | 23    | 87                | 0.74            | 0.46                         | 1.00                         |
|                                                   | 1-4                             | 23    | 78                | 0.56            | 0.21                         | 0.91                         |
| <b>Subretinal Fluid</b>                           | 1-2                             | 23    | 100               | 1.00            | 1.00                         | 1.00                         |
|                                                   | 1-3                             | 23    | 91                | 0.81            | 0.54                         | 1.00                         |
|                                                   | 1-4                             | 23    | 83                | 0.64            | 0.32                         | 0.96                         |
| Subretinal Fluid within fovea                     | 1-2                             | 23    | 87                | 0.66            | 0.30                         | 1.00                         |
|                                                   | 1-3                             | 23    | 83                | 0.57            | 0.20                         | 0.95                         |
|                                                   | 1-4                             | 23    | 87                | 0.66            | 0.30                         | 1.00                         |
| Subretinal Fluid at foveal center                 | 1-2                             | 23    | 100               | 1.00            | 1.00                         | 1.00                         |
|                                                   | 1-3                             | 23    | 96                | 0.84            | 0.53                         | 1.00                         |
|                                                   | 1-4                             | 23    | 100               | 1.00            | 1.00                         | 1.00                         |
| <b>Macular Fluid</b>                              | 1-2                             | 23    | 83                | 0.23            | -0.30                        | 0.77                         |
|                                                   | 1-3                             | 23    | 83                | 0.40            | -0.07                        | 0.87                         |
|                                                   | 1-4                             | 23    | 78                | 0.33            | -0.11                        | 0.77                         |

**Legend:** OCT = optical coherence tomography. CL = confidence limit. Fovea = 1 mm diameter horizontal region centered at the middle of the fovea. VMA = any vitreous attachment and separation from the retina within a 3 mm diameter horizontal region centered at the middle of the fovea. Foveal deformation = any retinal distortion within the fovea. RPE = retinal pigment epithelium. Macular fluid = presence of any one or

more of the following: intraretinal fluid, subretinal fluid, or sub-RPE fluid. \* = kappa could not be computed for tables that were asymmetric or that were symmetric without matching rows and columns. For this ongoing analysis, 23 randomly selected scans uploaded July 2009 were reevaluated by a repeat grading team at each of the following time points after baseline: time 1 = 3 months, time 2 = 8 months, and time 3 = 12 months. After repeat grading, values were compared to those from initial grading. A repeat grading team was comprised of a Senior Reader and two readers who had not initially graded a particular scan. A morphological feature was not interpretable for grading if any one of the following conditions existed: inadequate positioning, poor saturation, absent scan, or portion of feature extends off radial line scan.
