# Supplementary material
Source: PubMed Central journal article supplement (PMC3631582)
Supplement: NIHMS390799-supplement-04.pdf [file NIHMS390799-supplement-04.pdf]

**Table 4:**

**Reading Center Team quantitative agreement during four serial OCT evaluations**

| Variable                                                             | Times | Statistic      | Value at     | Value at       | Paired Difference | P-Value* | Intraclass           |
|----------------------------------------------------------------------|-------|----------------|--------------|----------------|-------------------|----------|----------------------|
|                                                                      |       |                | Time 1       | Repeat Grading |                   |          | Correlation (95% CI) |
| RPE Elevation Height - maximum vertical dimension on any scan        | 1-2   | N              |              |                | 21**              |          |                      |
|                                                                      |       | Mean (SD)      | 122 (84)     | 134 (89)       | -7 (26)           | 0.215    | 0.95 (0.89, 0.98)    |
|                                                                      |       | Min,Median,Max | 22,93,407    | 55,99,440      | -55,0,44          |          |                      |
|                                                                      | 1-3   | N              |              |                | 22**              |          |                      |
|                                                                      |       | Mean (SD)      | 122 (84)     | 133 (91)       | -11 (23)          | 0.021    | 0.96 (0.90, 0.98)    |
|                                                                      |       | Min,Median,Max | 22,93,407    | 33,104,418     | -55,-11,44        |          |                      |
|                                                                      | 1-4   | N              |              |                | 22**              |          |                      |
|                                                                      |       | Mean (SD)      | 122 (84)     | 135 (81)       | -12 (26)          | 0.041    | 0.94. 0.87, 0.98     |
|                                                                      |       | Min,Median,Max | 22,93,407    | 55,110,396     | -66,-16,44        |          |                      |
| RPE Elevation Width - maximum horizontal dimension on any scan       | 1-2   | N              |              |                | 20**              |          |                      |
|                                                                      |       | Mean (SD)      | 730 (520)    | 898 (646)      | -146 (488)        | 0.237    | 0.64 (0.29, 0.84)    |
|                                                                      |       | Min,Median,Max | 110,616,2068 | 110,880,2310   | -1320,-27,605     |          |                      |
|                                                                      | 1-3   | N              |              |                | 20**              |          |                      |
|                                                                      |       | Mean (SD)      | 730 (520)    | 749 (461)      | -32 (331)         | 0.821    | 0.78 (0.53, 0.90)    |
|                                                                      |       | Min,Median,Max | 110,616,2068 | 88,632,1595    | -880,-5,495       |          |                      |
|                                                                      | 1-4   | N              |              |                | 21**              |          |                      |
|                                                                      |       | Mean (SD)      | 730 (520)    | 825 (495)      | -108 (325)        | 0.151    | 0.78 (0.54, 0.90)    |
|                                                                      |       | Min,Median,Max | 110,616,2068 | 121,638,1760   | -968,-66,528      |          |                      |
| Mean Retinal Thickness at Foveal Center Point (micrometers)          | 1-2   | N              |              |                | 23                |          |                      |
|                                                                      |       | Mean (SD)      | 162 (50)     | 162 (46)       | -0.2 (13)         | 0.880    | 0.97 (0.92, 0.99)    |
|                                                                      |       | Min,Median,Max | 48,148,304   | 57,150,302     | -26,0,26          |          |                      |
|                                                                      | 1-3   | N              |              |                | 23                |          |                      |
|                                                                      |       | Mean (SD)      | 162 (50)     | 163 (46)       | -0.7 (12)         | 0.757    | 0.97 (0.93, 0.99)    |
|                                                                      |       | Min,Median,Max | 48,148,304   | 55,156,299     | -22,-2,20         |          |                      |
|                                                                      | 1-4   | N              |              |                | 23                |          |                      |
|                                                                      |       | Mean (SD)      | 162 (50)     | 165 (45)       | -0.7 (12)         | 0.757    | 0.95 (0.90, 0.98)    |
|                                                                      |       | Min,Median,Max | 48,148,304   | 71,152,304     | -22,-2,20         |          |                      |
| Mean Subretinal Fluid Thickness at Foveal Center Point (micrometers) | 1-2   | N              |              |                | 23                |          |                      |

## Reading Center Team quantitative agreement during four serial OCT evaluations

| Variable                                                  | Times                                                          | Statistic      | Value at      | Value at       | Paired Difference | P-Value* | Intraclass           |                   |
|-----------------------------------------------------------|----------------------------------------------------------------|----------------|---------------|----------------|-------------------|----------|----------------------|-------------------|
|                                                           |                                                                |                | Time 1        | Repeat Grading |                   |          | Correlation (95% CI) |                   |
|                                                           |                                                                | Mean (SD)      | 4 (13)        | 4 (13)         | -0.1 (0.4)        | 1.000    | 1.00 (1.00, 1.00)    |                   |
|                                                           |                                                                | Min,Median,Max | 0,0,60        | 0,0,60         | -2,0,0            |          |                      |                   |
|                                                           | 1-3                                                            | N              |               |                | 23                |          |                      |                   |
|                                                           |                                                                | Mean (SD)      | 0,0,60        | 4 (13)         | -0.4 (3)          | 1.000    | 0.98 (0.94, 0.99)    |                   |
|                                                           |                                                                | Min,Median,Max | 4 (13)        | 0,0,57         | -13,0,4           |          |                      |                   |
|                                                           | 1-4                                                            | N              |               |                | 23                |          |                      |                   |
|                                                           |                                                                | Mean (SD)      | 4 (13)        | 4 (13)         | 0 (0)             |          | 1.00                 |                   |
|                                                           |                                                                | Min,Median,Max | 0,0,60        | 0,0,60         | 0,0,0             |          |                      |                   |
|                                                           | CNV-PED Complex Thickness at Foveal Center Point (micrometers) |                | N             |                |                   | 23       |                      |                   |
|                                                           |                                                                |                | Mean (SD)     | 103 (102)      | 106 (102)         | -2 (21)  | 0.730                | 0.98 (0.95, 0.99) |
|                                                           |                                                                | Min,Median,Max | 33,49,433     | 24,59,423      | -48,0,28          |          |                      |                   |
|                                                           |                                                                | 1-3            | N             |                |                   | 23       |                      |                   |
|                                                           |                                                                | Mean (SD)      | 103 (102)     | 112 (101)      | -9 (22)           | 0.108    | 0.97 (0.94, 0.99)    |                   |
|                                                           |                                                                | Min,Median,Max | 33,49,433     | 31,60,434      | -79,-9,16         |          |                      |                   |
| 1-4                                                       |                                                                | N              |               |                | 23                |          |                      |                   |
|                                                           |                                                                | Mean (SD)      | 103 (102)     | 104 (99)       | -0.9 (22)         | 0.935    | 0.98 (0.95, 0.99)    |                   |
|                                                           |                                                                | Min,Median,Max | 33,49,433     | 31,53,412      | -51,4,37          |          |                      |                   |
| Mean Total Thickness at Foveal Center Point (micrometers) |                                                                |                | N             |                |                   | 23       |                      |                   |
|                                                           |                                                                |                | Mean (SD)     | 269 (113)      | 272 (115)         | -3 (28)  | 0.713                | 0.97 (0.94, 0.99) |
|                                                           |                                                                | Min,Median,Max | 160, 234, 546 | 149, 231, 578  | -73,0,35          |          |                      |                   |
|                                                           | 1-3                                                            | N              |               |                | 23                |          |                      |                   |
|                                                           |                                                                | Mean (SD)      | 270 (113)     | 279 (110)      | -10 (25)          | 0.092    | 0.97 (0.94, 0.99)    |                   |
|                                                           |                                                                | Min,Median,Max | 160, 234, 546 | 161, 233,563   | -83,-9,,26        |          |                      |                   |
|                                                           | 1-4                                                            | N              |               |                | 23                |          |                      |                   |
|                                                           |                                                                | Mean (SD)      | 269 (113)     | 273 (106)      | -4 (26)           | 0.778    | 0.97 (0.94, 0.99)    |                   |
|                                                           |                                                                | Min,Median,Max | 160, 234, 546 | 172, 226, 546  | -70,0,29          |          |                      |                   |

OCT = optical coherence tomography. RPE = retinal pigment epithelium. CNV-PED complex = Mean RPE + RPE Elevation + Subretinal Hyper Reflective Material thickness. CI = confidence interval. For this ongoing analysis, 23 randomly selected scans uploaded July 2009 were reevaluated by a repeat grading team at each of the following time points after baseline: time 1 = 3 months, time 2 = 8 months, and time 3 = 12 months. After repeat grading, values were compared to those from initial grading. A repeat grading team was comprised of a Senior Reader and two readers who had not initially graded a particular scan. RPE = retinal pigment epithelium. \*P-value based on Wilcoxon signed rank test of median difference equal to zero. \*\*RPE elevation not present on every scan for measurement.
