# Supplementary material
Source: PubMed Central journal article supplement (PMC3631582)
Supplement: NIHMS390799-supplement-05.pdf [file NIHMS390799-supplement-05.pdf]

**Figure 5:**

OCT scan work-flow demonstrated for reproducibility analysis between hypothetical Reading Center “Team A” and “Team B” when grading the same scan. All team analyses were performed more than 5 weeks after initial reading.

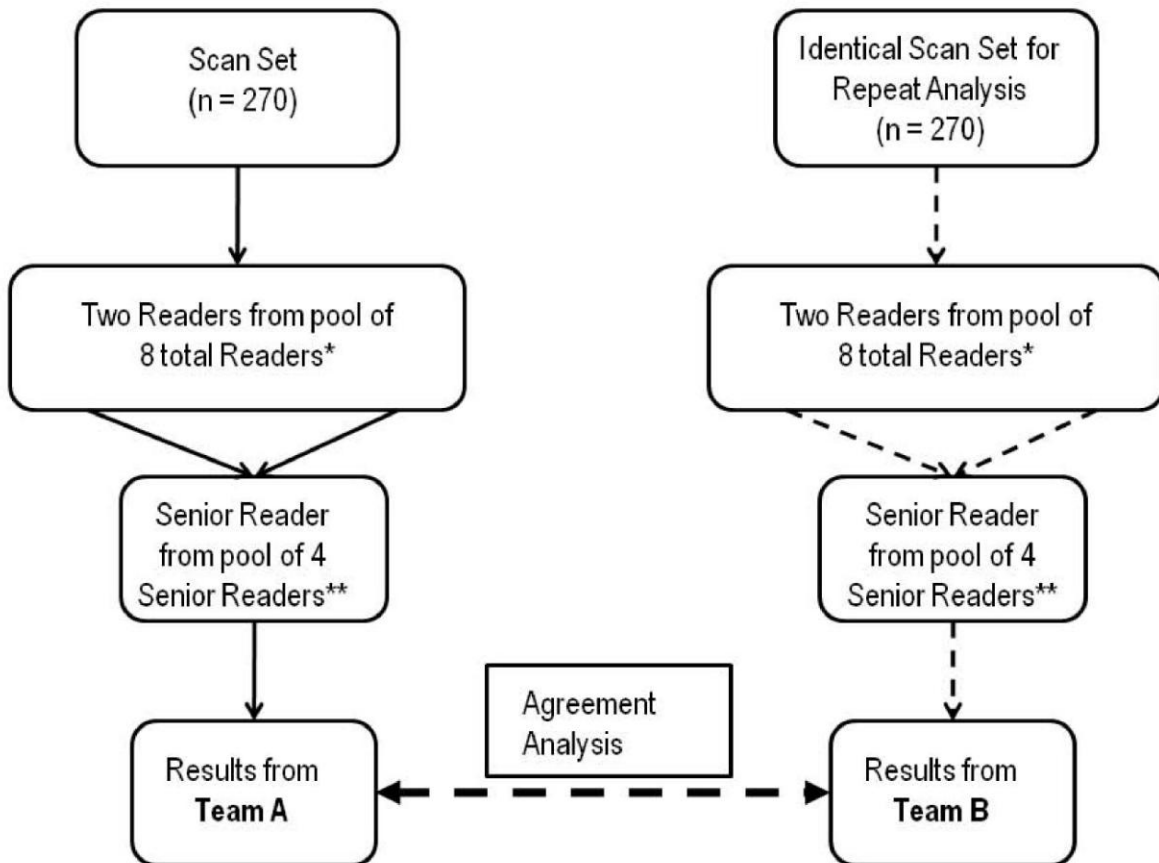

**Legend:** solid lines = initial grading, dashed lines = reproducibility analysis. \*Readers were randomly selected from pool of 8 readers, and no individual reader was part of both team A and B. \*\*Senior Readers were randomly selected from pool of 4 Senior Readers, and no individual Senior Reader was part of both team A and B.
